# Supplementary material
Source: Elsevier journal article supplement (https://www.sciencedirect.com/science/article/pii/S1808869418303902)
Supplement: mmc1 [file S1808869418303902:mmc1.pdf]

## COMITÊ DE ÉTICA EM PESQUISA DA UNICAMP - CAMPUS CAMPINAS

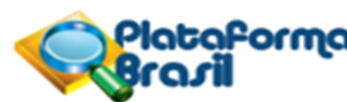

### PARECER CONSUBSTANCIADO DO CEP

#### DADOS DO PROJETO DE PESQUISA

**Título da Pesquisa:** Adaptação cultural e validação do Índice de Incapacidade Facial para português falado no Brasil

**Pesquisador:** Agnaldo José Graciano

**Área Temática:**

**Versão:** 1

**CAAE:** 49967415.0.0000.5404

**Instituição Proponente:** Hospital de Clínicas da UNICAMP

**Patrocinador Principal:** Financiamento Próprio

#### DADOS DO PARECER

**Número do Parecer:** 1.304.170

#### Apresentação do Projeto:

Adequada. Paralisia facial pode ocorrer devido a uma grande variedade de causas clínicas, traumáticas, e iatrogênicas, como complicações ou sequelas cirúrgicas. A disfunção da motricidade facial resultante dessas condições pode levar a diferentes graus de alterações de funções básicas como comer, beber, falar, além de esperado prejuízo na mímica facial e suas consequências na capacidade de interação e expressão social. Consequentemente, a incapacidade facial se reflete na percepção geral do paciente sobre sua saúde e qualidade de vida. Um dos principais obstáculos para se avaliar subjetivamente a qualidade de vida de pacientes com paralisia facial é a limitação que questionários gerais têm para discriminar as dificuldades específicas enfrentadas por estes indivíduos. Desenvolvido para superar estas limitações, o Facial Disability Index (FDI) é um questionário que acessa aspectos da qualidade de vida relacionados às limitações físicas e psicossociais decorrentes de alterações da motricidade facial, e que se mostrou válido e mais específico que outras ferramentas gerais de avaliação de qualidade de vida<sup>4</sup>. Embora tenha sido utilizado em vários estudos e adaptado para outras línguas, o FDI ainda não foi submetido à adaptação cultural e validação para o português. Portanto, o objetivo deste estudo é realizar a adaptação cultural e validação do FDI para o português falado no Brasil.

**Endereço:** Rua Tessália Vieira de Camargo, 126

**Bairro:** Barão Geraldo

**CEP:** 13.083-887

**UF:** SP

**Município:** CAMPINAS

**Telefone:** (19)3521-8936

**Fax:** (19)3521-7187

**E-mail:** cep@fcm.unicamp.br

## COMITÊ DE ÉTICA EM PESQUISA DA UNICAMP - CAMPUS CAMPINAS



Continuação do Parecer: 1.304.170

### **Objetivo da Pesquisa:**

Adaptação e validação do questionário “Facial Disability Index”, realizando a tradução para o português com as adequadas adaptações transculturais e linguísticas.

### **Avaliação dos Riscos e Benefícios:**

Riscos:

Não existem riscos específicos tratando-se de respostas escritas de um breve questionário.

Benefícios:

Validação do método para aplicação na prática clínica de pacientes com paralisia facial.

### **Comentários e Considerações sobre a Pesquisa:**

Adaptação realizada utilizando a técnica de tradução-retradução conforme recomendações da International Society for Pharmacoeconomics and Outcome Research, que sugere as seguintes etapas: 1) Preparação: contato com o pesquisador principal que desenvolveu o questionário original para autorização da adaptação e obtido o consentimento da Associação Americana de Fisioterapia detentora dos direitos sobre o artigo original publicado no periódico Physical Therapy. 2) Tradução inicial a partir do original do FDI em Inglês Americano para o português: realizada por dois tradutores independentes cuja primeira língua seja o português. 3) Reconciliação: As versões obtidas são avaliadas por ao menos dois pesquisadores envolvidos no projeto e comparadas para diferenças e submetidas à reconciliação e preparação de uma única versão inicial da tradução para o português. 4) Retradução: Nesta fase a versão inicial em português é então retraduzida para o inglês por outros dois tradutores cuja língua materna seja o inglês americano e que desconheçam o questionário original. 5) Revisão das retraduições: Os pesquisadores comparam as retraduições com o questionário original e com a versão de reconciliação para determinar se as versões apresentam resultados diferentes do original (perda do significado original), literais (idêntico ao original) ou similar (embora algumas palavras apresentem significados diferentes o conceito do questionário se mantém). 6) Harmonização da retradução: Após as comparações das retraduições modificações são realizadas para conciliar discrepâncias uma segunda versão do questionário é desenvolvida. 7) Desdobramentos cognitivos: A segunda versão do questionário é testada em 20 pacientes para verificar a necessidade de vocábulos alternativos, interpretabilidade, compreensibilidade, e relevância cultural da tradução. O questionário é autoaplicado pelo paciente e após respondê-lo, os pesquisadores solicitam que o paciente registre qual foi o entendimento que o paciente teve de cada item, graduando em pontuação de 1 a 10 (da menor facilidade de entendimento para a maior facilidade) considerando que escores entre 1 e 4 representariam enunciados mal interpretados, entre 5 e 7 um enunciado pouco claro e, entre 8 e 10 um enunciado

**Endereço:** Rua Tessália Vieira de Camargo, 126

**Bairro:** Barão Geraldo

**CEP:** 13.083-887

**UF:** SP

**Município:** CAMPINAS

**Telefone:** (19)3521-8936

**Fax:** (19)3521-7187

**E-mail:** cep@fcm.unicamp.br

## COMITÊ DE ÉTICA EM PESQUISA DA UNICAMP - CAMPUS CAMPINAS



Continuação do Parecer: 1.304.170

claro, conforme proposto por Tavares et al 6. O índice de clareza foi obtido por meio da média das somatórias das notas atribuídas pelos pacientes. Os enunciados que não atingissem o índice 0,4 deveriam ser substituídos, os enunciados que não atingissem o índice 0,8 deveriam ser reformulados e, finalmente, os enunciados que apresentassem o índice final igual ou acima de 0,8 eram considerados adequados quanto ao seu entendimento. 8 – Revisão dos desdobramentos cognitivos e finalização: avaliação da interpretação dos pacientes sobre o questionário traduzido para determinar discrepâncias do significado original pretendido. 9 – Elaboração da versão final: os pesquisadores envolvidos nas etapas anteriores avaliam as modificações obtidas no processo e produzem a versão final traduzida e adaptada para o português falado no Brasil. – Validação do questionário FDI em português e Análise estatística. Aplicação da versão final do questionário FDI em formato teste e reteste em um grupo de 20 pacientes com paralisia facial periférica atendidos no ambulatório de paralisia facial da Disciplina de Otorrinolaringologia do Hospital das Clínicas da UNICAMP.

### **Considerações sobre os Termos de apresentação obrigatória:**

Além do relatório de pesquisa, foi encaminhada a folha de rosto da CONEP assinada pela pesquisadora e complementada por autorização do Coordenador de Assistência do Hospital das Clínicas da Unicamp. Com relação ao TCLE, a linguagem é clara. No TCLE constam o título completo da pesquisa e o nome do pesquisador responsável. Constam a justificativa, uma descrição dos procedimentos envolvidos, riscos e benefícios. Está explicado como será feito o acompanhamento, e que poderá haver esclarecimentos se necessário. Está claro o direito de recusa, e que a recusa não acarretará em consequências para o tratamento do paciente. Está claro que haverá confidencialidade dos dados. Está claro no TCLE que o sujeito irá receber uma via. Há dados do CEP e formas de contato com o pesquisador.

### **Conclusões ou Pendências e Lista de Inadequações:**

Aprovado.

### **Considerações Finais a critério do CEP:**

- O sujeito de pesquisa deve receber uma via do Termo de Consentimento Livre e Esclarecido, na íntegra, por ele assinado.
- O sujeito da pesquisa tem a liberdade de recusar-se a participar ou de retirar seu consentimento em qualquer fase da pesquisa, sem penalização alguma e sem prejuízo ao seu cuidado.

**Endereço:** Rua Tessália Vieira de Camargo, 126

**Bairro:** Barão Geraldo

**CEP:** 13.083-887

**UF:** SP

**Município:** CAMPINAS

**Telefone:** (19)3521-8936

**Fax:** (19)3521-7187

**E-mail:** cep@fcm.unicamp.br

## COMITÊ DE ÉTICA EM PESQUISA DA UNICAMP - CAMPUS CAMPINAS



Continuação do Parecer: 1.304.170

- O pesquisador deve desenvolver a pesquisa conforme delineada no protocolo aprovado. Se o pesquisador considerar a descontinuação do estudo, esta deve ser justificada e somente ser realizada após análise das razões da descontinuidade pelo CEP que o aprovou. O pesquisador deve aguardar o parecer do CEP quanto à descontinuação, exceto quando perceber risco ou dano não previsto ao sujeito participante ou quando constatar a superioridade de uma estratégia diagnóstica ou terapêutica oferecida a um dos grupos da pesquisa, isto é, somente em caso de necessidade de ação imediata com intuito de proteger os participantes.

- O CEP deve ser informado de todos os efeitos adversos ou fatos relevantes que alterem o curso normal do estudo. É papel do pesquisador assegurar medidas imediatas adequadas frente a evento adverso grave ocorrido (mesmo que tenha sido em outro centro) e enviar notificação ao CEP e à Agência Nacional de Vigilância Sanitária – ANVISA – junto com seu posicionamento.

- Eventuais modificações ou emendas ao protocolo devem ser apresentadas ao CEP de forma clara e sucinta, identificando a parte do protocolo a ser modificada e suas justificativas. Em caso de projetos do Grupo I ou II apresentados anteriormente à ANVISA, o pesquisador ou patrocinador deve enviá-las também à mesma, junto com o parecer aprovatório do CEP, para serem juntadas ao protocolo inicial.

- Relatórios parciais e final devem ser apresentados ao CEP, inicialmente seis meses após a data deste parecer de aprovação e ao término do estudo.

- Lembramos que segundo a Resolução 466/2012, item XI.2 letra e, “cabe ao pesquisador apresentar dados solicitados pelo CEP ou pela CONEP a qualquer momento”.

### Este parecer foi elaborado baseado nos documentos abaixo relacionados:

| Tipo Documento                 | Arquivo                                          | Postagem               | Autor                    | Situação |
|--------------------------------|--------------------------------------------------|------------------------|--------------------------|----------|
| Informações Básicas do Projeto | PB_INFORMAÇÕES_BÁSICAS_DO_P<br>ROJETO_594927.pdf | 04/10/2015<br>11:54:40 |                          | Aceito   |
| Outros                         | Anuencia_Oorrino.pdf                             | 04/10/2015<br>11:54:02 | Agnaldo José<br>Graciano | Aceito   |
| Folha de Rosto                 | Folha_de_Rosto.pdf                               | 04/10/2015<br>11:53:17 | Agnaldo José<br>Graciano | Aceito   |

**Endereço:** Rua Tessália Vieira de Camargo, 126

**Bairro:** Barão Geraldo

**CEP:** 13.083-887

**UF:** SP

**Município:** CAMPINAS

**Telefone:** (19)3521-8936

**Fax:** (19)3521-7187

**E-mail:** cep@fcm.unicamp.br

## COMITÊ DE ÉTICA EM PESQUISA DA UNICAMP - CAMPUS CAMPINAS



Continuação do Parecer: 1.304.170

|                                                                    |                                 |                        |                          |        |
|--------------------------------------------------------------------|---------------------------------|------------------------|--------------------------|--------|
| Outros                                                             | Versao_Testes_FDI_Portugues.pdf | 04/10/2015<br>11:02:00 | Agnaldo José<br>Graciano | Aceito |
| Outros                                                             | Back_Translation_2_FDI.pdf      | 04/10/2015<br>11:00:15 | Agnaldo José<br>Graciano | Aceito |
| Outros                                                             | Back_Translation_1_FDI.pdf      | 04/10/2015<br>10:59:17 | Agnaldo José<br>Graciano | Aceito |
| Outros                                                             | Versao_Recon_FDI.pdf            | 04/10/2015<br>10:57:44 | Agnaldo José<br>Graciano | Aceito |
| Outros                                                             | Tradutor_2_FDI.pdf              | 04/10/2015<br>10:52:50 | Agnaldo José<br>Graciano | Aceito |
| Outros                                                             | Tradutor_1_FDI.pdf              | 04/10/2015<br>10:51:32 | Agnaldo José<br>Graciano | Aceito |
| Projeto Detalhado /<br>Brochura<br>Investigador                    | Projeto_Detalhado_FDI.pdf       | 04/10/2015<br>10:49:54 | Agnaldo José<br>Graciano | Aceito |
| TCLE / Termos de<br>Assentimento /<br>Justificativa de<br>Ausência | TCLE_FDI.pdf                    | 04/10/2015<br>10:48:58 | Agnaldo José<br>Graciano | Aceito |

### Situação do Parecer:

Aprovado

### Necessita Apreciação da CONEP:

Não

CAMPINAS, 30 de Outubro de 2015

---

**Assinado por:**  
**Renata Maria dos Santos Celeghini**  
**(Coordenador)**

**Endereço:** Rua Tessália Vieira de Camargo, 126

**Bairro:** Barão Geraldo

**CEP:** 13.083-887

**UF:** SP

**Município:** CAMPINAS

**Telefone:** (19)3521-8936

**Fax:** (19)3521-7187

**E-mail:** cep@fcm.unicamp.br
